# Supplementary material for: Enhanced response of an infrared photodetector based on hybridization between reduced graphene oxide and up-conversion microparticles
Source: Royal Society of Chemistry journal article supplement (doi:10.1039/d4ra07919a), 2025-01-01
Supplement: d4ra07919a1.pdf [file d4ra07919a1.pdf]

## Enhanced response of infrared photodetector based on reduced graphene oxide and up-conversion microparticles

Vuong Thanh Tuyen<sup>1,2</sup>, Duc Anh Ngo<sup>1,2</sup>, Le Thai Duy<sup>1,2</sup>,  
Nguyen Duc Hao<sup>1,2</sup>, Nhu Hoa Tran Thi<sup>1,2</sup>, Vinh Quang Dang<sup>1,2</sup>, Tran T.T Van<sup>1,2\*</sup>

1. Faculty of Materials Science and Technology, University of Science, Ho Chi Minh City, Vietnam
2. Vietnam National University Ho Chi Minh City, Vietnam

\* Corresponding email: [tttvan@hcmus.edu.vn](mailto:tttvan@hcmus.edu.vn)

### ***Preparation of the up-conversion microparticle NaYF<sub>4</sub>: 0.5% Tm, 30% Yb***

The synthesis of the NaYF<sub>4</sub>: 0.5% Tm, 30% Yb UCMPs sample was performed in two stages, starting with the preparation of RE stearate (**Figure S1a**). Firstly, RE(NO<sub>3</sub>)<sub>3</sub>·6H<sub>2</sub>O, stearic acid, and ethanol were stirred at 54°C for 30 min. Next, system was heated to 74°C, drop NaOH solution and continue stir in 40 min. Then, it was washed with ethanol and dried at 60°C for 12h. Finally, RE stearate (TmS, YbS, YS) was obtained as a white powder.

The second process for the fabrication of UCMPs was carried out as shown in **Figure S1b**. To begin with, water, ethanol, and oleic acid were stirred for 30 min. Then mixture of TmS, YbS, YS, and NaF were added and stirred for 30 min. Next, a hydrothermal process was carried out in an steel tank at 180°C for 24 h. A yellowish solution was obtained, then centrifuged and washed with chloroform and ethanol at a ratio of 1:6. Finally, white powder UCMPs NaYF<sub>4</sub>: 0.5% Tm, 30% Yb was obtained after drying at 100°C for 12 h.

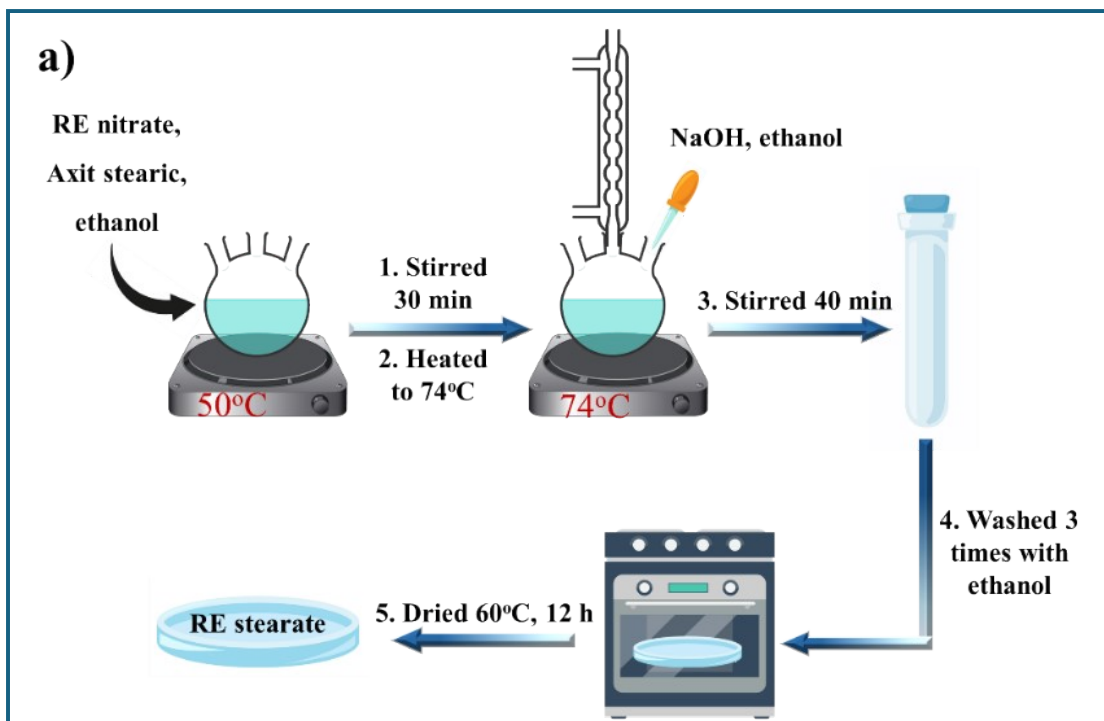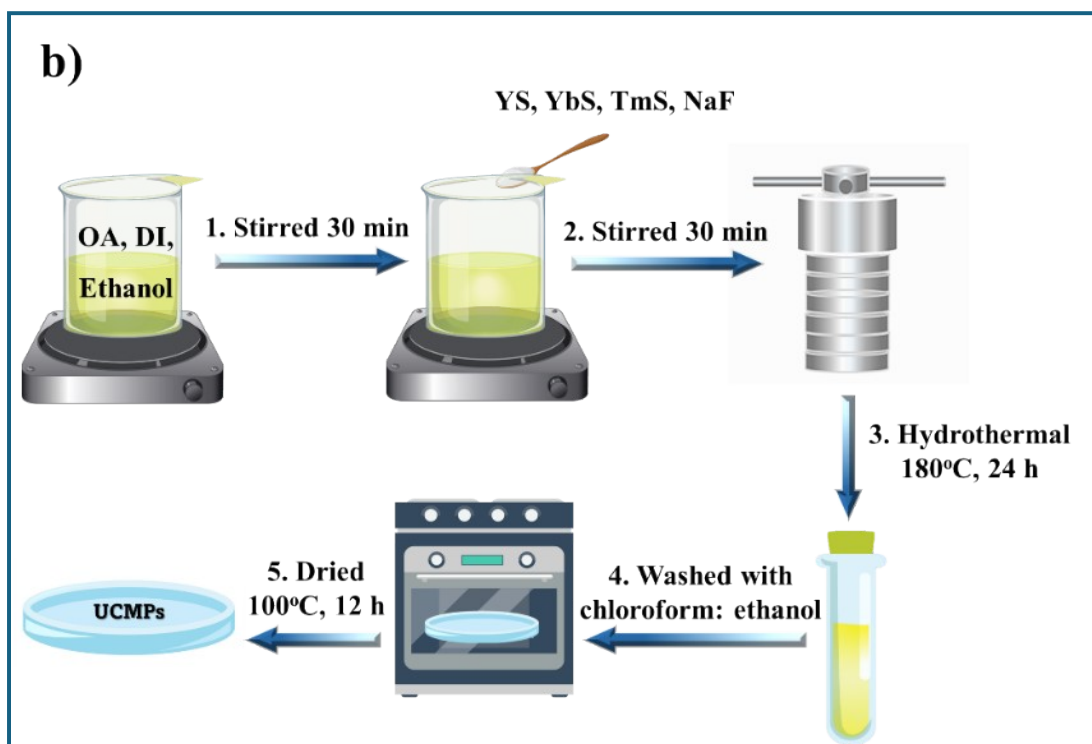

**Figure S1.** Fabrication process of a) RE stearate and b) upconversion luminescent nanoparticles (UCMPs).

*Structural characteristics and surface morphology*

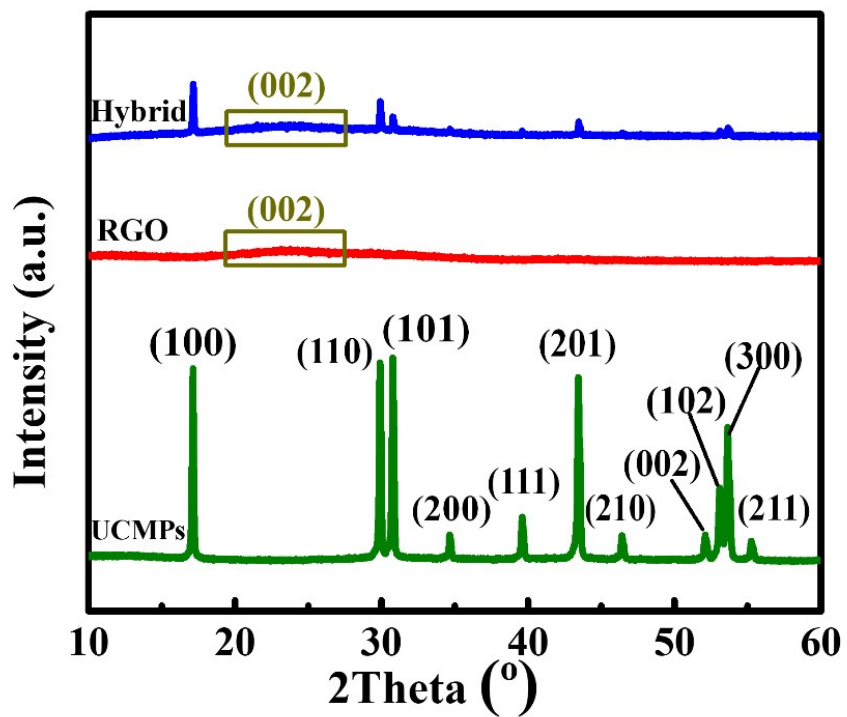

Figure S2. XRD pattern of UCMPs, RGO and hybrid UCMPs/RGO

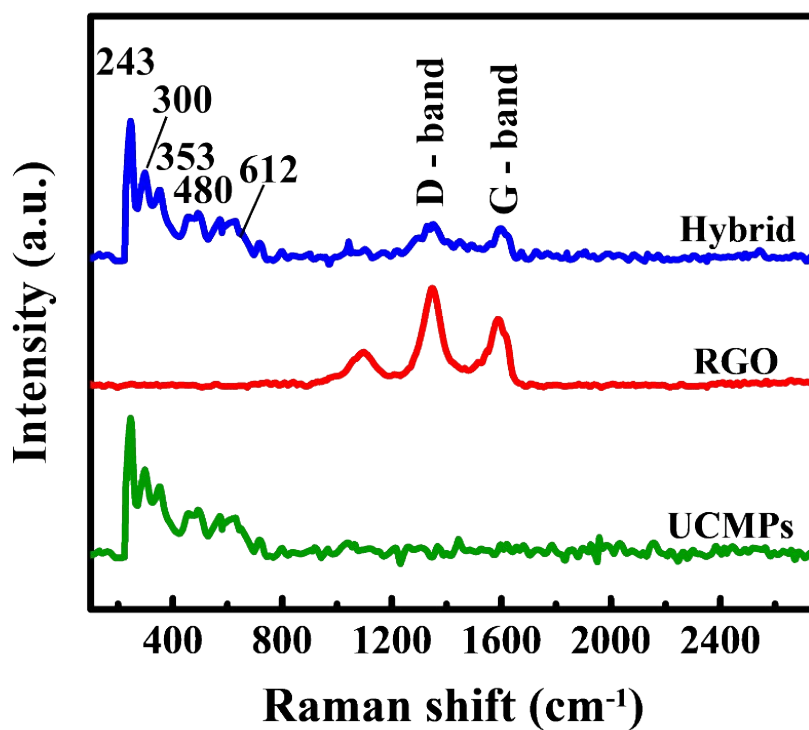

Figure S3. Raman spectrum of UCMPs, RGO and hybrid UCMPs/RGO

*Characteristic properties of IR photodetectors*

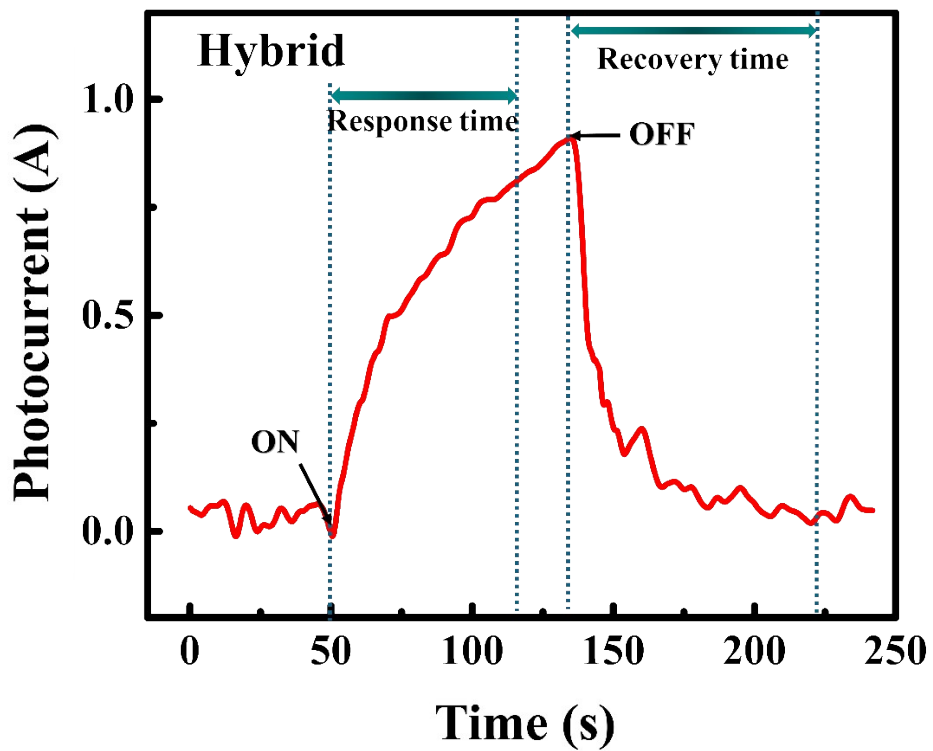

**Figure S4.** *Response and recovery time of photodetector UCMPs/RGO hybrid under 980 nm*

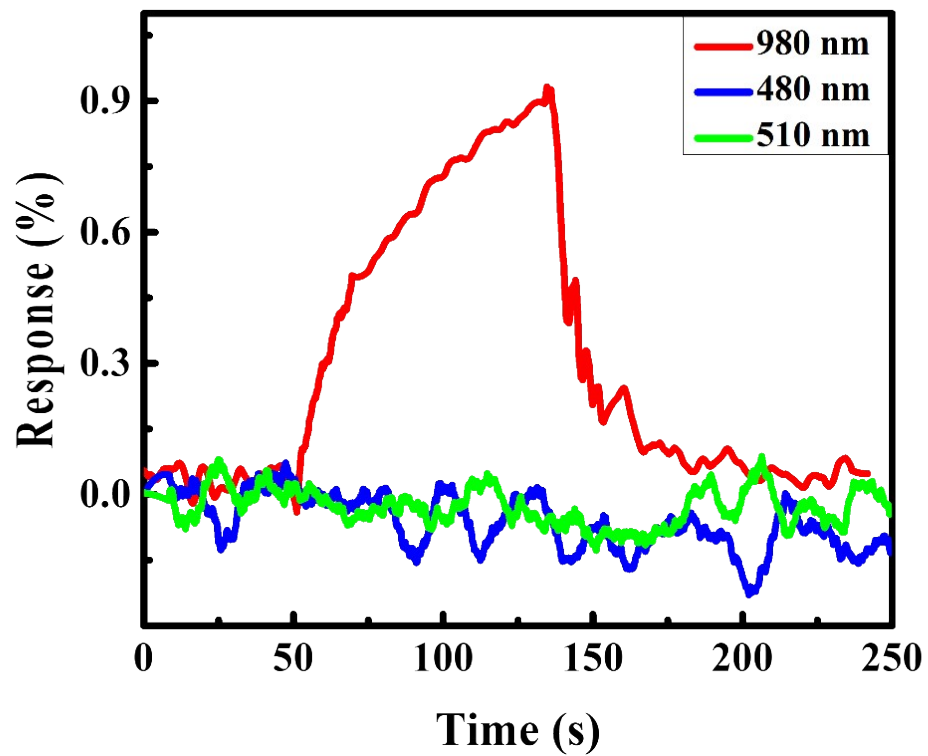

**Figure S5.** Response of photodetector UCMPs/RGO hybrid under 980 nm, 480 nm, 510 nm LED illumination.
